# Supplementary material
Source: publisher site journal article supplement (https://www.dovepress.com/get_supplementary_file.php?f=230138.xlsx)
Supplement: Supplementary file 1 [file get_supplementary_file.php]

## Sheet: Sheet1
Table S1 Supplementary multivariate logistic regression analysis for patients with gastric adenocarcinomas.
Variable	Adjust OR (95% CI)	P value	Adjust OR (95% CI)	P value	Adjust OR (95% CI)	P value
Maximum diameter of tumor (cm)	1.120(1.014-1.236)	0.025	1.112(1.007-1.229)	0.036	1.123(1.017-1.240)	0.022
Differentiation degree
Differentiated type	5.776(3.083-10.821)	<0.001	5.952(3.182-11.133)	<0.001	6.689(3.556-12.581)	<0.001
Mixed type	2.813(1.458-5.427)	0.002	2.898(1.505-5.580)	0.001	3.125(1.621-6.024)	0.001
Undifferentiated type	1		1		1
Vascular invasion status (yes vs. no)	0.802(0.442-1.456)	0.468	0.733(0.404-1.329)	0.306	0.697(0.384-1.264)	0.235
Neural invasion status (yes vs. no)	0.796(0.428-1.480)	0.47	0.806(0.435-1.495)	0.494	0.866(0.468-1.602)	0.646
CAV in arterial phase* (≥67.36 vs. <67.36; HU)	2.583(1.548-4.310)	<0.001
cCAV in arterial phase* (≥0.255 vs. <0.255)			2.348(1.404-3.927)	0.001
CAV in portal phase* (≥70.37 vs. <70.37; HU)					3.188(1.52-6.462)	0.001
Note: *These analyses were done in separate multivariate Cox regression analyses.
Abbreviations: CAV, CT attenuate value; cCAV, corrected CT attenuate value; OR, odd ratio.
